# Supplementary material for: Histone Deacetylase 1 and 3 Regulate the Mesodermal Lineage Commitment of Mouse Embryonic Stem Cells
Source: PLoS One. 2014 Nov 20;9(11):e113262. doi: 10.1371/journal.pone.0113262 (PMC4239075; doi:10.1371/journal.pone.0113262)
Supplement: Table S2 — Primer sets used in qRT-PCR assays. (DOC) [file pone.0113262.s004.doc]

**Table S2.** Primer sets used in qRT-PCR assays.

| HDAC1 | GGGCACCAAGAGGAAAGTCT | F |
| --- | --- | --- |
| AGCAAATTGTGAGTCATGCG | R |
| HDAC2 | CATGGCGTACAGTCAAGGAG | F |
| TCATCCGGATTCTATGAGGC | R |
| HDAC3 | AGTCAGCCCCACCAATATGC | F |
| CCTGTGTAACGGGAGCAGAACT | R |
| HDAC8 | TTTGAGCGTATTCTCTACGTGGA | F |
| ACACTGTAGTACCGTCCCTTC | R |
| Nanog | AGGGTCTGCTACTGAGATGCTCTG | F |
| CAACCACTGGTTTTTCTGCCACCG | R |
| Oct4 | TCTTTCCACCAGGCCCCCGGCTC | F |
| TGCGGGCGGACATGGGGAGATCC | R |
| Rex1 | GGAAGAAATGCTGAAGGTGGAGAC | F |
| AGTCCCCATCCCCTTCAATAGC | R |
| T | GGTGGCTTGTTCCTGGTGC | F |
| GTAGGTGGGCTGGCGTTAT | R |
| Gata4 | GATGGGACGGGACACTACCTG | F |
| ACCTGCTGGCGTCTTAGATTT | R |
| Flk1 | TTTGGCAAATACAACCCTTCAGA | F |
| GCAGAAGATACTGTCACCACC | R |
| Mef2c | AGCAAGAATACGATGCCATC | F |
| GAAGGGGTGGTGGTACGGTC | R |
| Gsc | ACCATCTTCACCGATGAGCAGC | F |
| CTTGGCTCGGCGGTTCTTAAAC | R |
| Pax6 | TCTTTGCTTGGGAAATCCG | F |
| CTGCCCGTTCAACATCCTTAG | R |
| Tuj1 | TAGACCCCAGCGGCAACTAT | F |
| GTTCCAGGTTCCAAGTCCACC | R |
| Neurod1 | GCTGCTGAGTCTCGGGATAG | F |
| GCTTGGCCTCTCTCTTTCCT | R |
| Olig1 | TGAATCCCACCTGTTTAGAGCC | F |
| CGATGCTCACGGATACGAGAATAG | R |
| Map2 | GGTCACAGGGCACCTATTCA | F |
| TGTTCACCTTTCAGGACTGC | R |
| Mash1 | AACGAGCGCGAGCGCAACCG | F |
| TTGGAGTAGTTGGGGGAGATG | R |
| N-cadherin | TCCTGATATATGCCCAAGACAA | F |
| TGACCCAGTCTCTCTTCTGC | R |
| Sox17 | CGAGCCAAAGCGGAGTCTC | F |
| TGCCAAGGTCAACGCCTTC | R |
| Lamin B1 | CCCCAATCTCTGTGAACCATG | F |
| GCAATTTGCACCGACACTGA | R |
| Mixl1 | TCCAGGATCCAGGTGTGGTT | F |
| GCAGGGCAATGGAGGAAAAC | R |
| Esrrb | GTCCCTCTCCGCGTTAGC | F |
| GGGGCAGGTTCGTCATTT | R |
| Fgf5 | AAAGTCAATGGCTCCCACGAA | F |
| GGCACTTGCATGGAGTTTTCC | R |
| Gata6 | GAGCTGGTGCTACCAAGAGG | F |
| TGCAAAAGCCCATCTCTTCT | R |
| Eomes | CCTGGTGGTGTTTTGTTGTG | F |
| TTTAATAGCACCGGGCACTC | R |
| GAPDH | AGGTCGGTGTGAACGGATTTG | F |
| TGTAGACCATGTAGTTGAGGTCA | R |
